# Supplementary material for: Antibody levels and protection after Hepatitis B vaccine in adult vaccinated healthcare workers in northern Uganda
Source: PubMed Central journal article supplement (PMC8782524; doi:10.1371/journal.pone.0262126), 2022-01-21

**Prevalence of Hepatitis B virus protective immune response among vaccinated healthcare personnel in selected regional referral hospitals in Uganda**

Questionnaire code: \_\_\_\_\_

**Sociodemographic characteristics**

1. Sex     Male         Female
2. Age (at last birthday) \_\_\_\_\_
3. Specialty/trainee position (*Tick ONLY one*)

| <b>Specialty / Trainee position</b> | <b>Yes/No<br/>(Tick)</b> | <b>Years spent working at<br/>this position<br/>(months or years)</b> |
|-------------------------------------|--------------------------|-----------------------------------------------------------------------|
| Medical officer                     |                          |                                                                       |
| Clinical officer                    |                          |                                                                       |
| Pharmacist                          |                          |                                                                       |
| Pharmacy tech                       |                          |                                                                       |
| Nursing officer                     |                          |                                                                       |
| Laboratory technician               |                          |                                                                       |
| Midwife                             |                          |                                                                       |
| Nursing assistant                   |                          |                                                                       |
| Intern doctor                       |                          |                                                                       |
| Intern pharmacist                   |                          |                                                                       |
| Intern nurse                        |                          |                                                                       |
| Intern pharmacist                   |                          |                                                                       |
| Others specify                      |                          |                                                                       |

**Hepatitis B virus risk and vaccination**

4. Have you had any of the following during the last three months (*Tick ALL that apply*)

| <b>Exposure</b>                   | <b>Yes</b> | <b>No</b> |
|-----------------------------------|------------|-----------|
| Needle prick injury               |            |           |
| Blood splash                      |            |           |
| Blood transfusion                 |            |           |
| Injection (I.M/I.V)               |            |           |
| Conducted surgical operation      |            |           |
| Had a tattoo on your skin         |            |           |
| Undergone an a surgical operation |            |           |
| Others specify,                   |            |           |

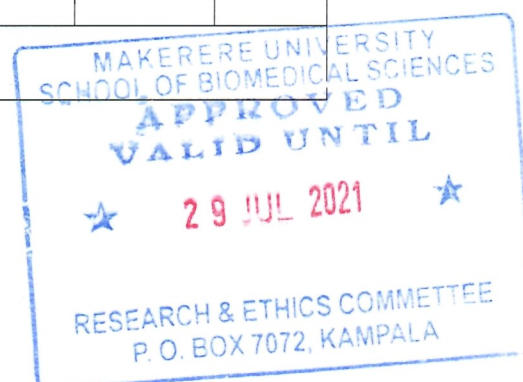

5. Have you ever tested for hepatitis B virus infection? Yes  No

6. Have you had hepatitis B virus vaccine before? Yes  No

If yes to question 6, answer questions 7-10

7. When did you receive the last dose of hepatitis B vaccine (day/month/year) \_\_\_\_\_

8. What was your age at the time you received the hepatitis B vaccine \_\_\_\_\_

9. How many doses of the vaccine did you get \_\_\_\_\_

10. Did you complete all the hepatitis vaccine series (3 doses)? Yes  No

11. In what time interval (in months) did you receive the vaccine? (*Tick only ONE*)

| Time interval ( <i>Months</i> ) | Yes | No |
|---------------------------------|-----|----|
| 0, 1, 6                         |     |    |
| 0, 3, 6                         |     |    |
| 0, 1, 2                         |     |    |
| 0, 2, 4                         |     |    |
| Do not recall                   |     |    |

12. If you did not complete all the hepatitis vaccine series, what was the reason? (*Tick ALL which apply*)

| Reason for not completing hepatitis B vaccine series | Yes | No |
|------------------------------------------------------|-----|----|
| The vaccine ran out of stock                         |     |    |
| Lacked money to pay for the vaccine                  |     |    |
| I lost interest in completing the dose               |     |    |
| Others specify,                                      |     |    |

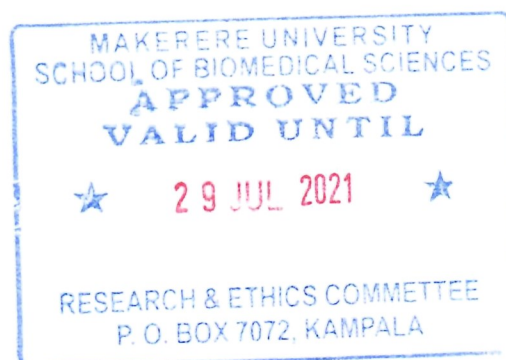

13. Did you perform hepatitis antibody titre test after completing the hepatitis B vaccine series

Yes  No

14. What was the concentration of hepatitis B antibodies found \_\_\_\_\_ mIU/mL

15. Have you received a booster dose of hepatitis B vaccine? Yes  No

16. If yes to 12, when did you receive the booster dose of hepatitis B vaccine? \_\_\_\_\_

17. In your facility, what factors would affect the hepatitis B vaccine efficacy (how well the vaccine will work if given)? *(Tick ALL that apply)*

| Factor(s)                                                  | Yes | No |
|------------------------------------------------------------|-----|----|
| Power fluctuations affecting hepatitis vaccines in storage |     |    |
| Mechanical problems affecting the fridge                   |     |    |
| People do not complete full vaccine series (3doses)        |     |    |
| Type of vaccine given (plasma derived or recombinant)      |     |    |
| Vaccine over staying in storage                            |     |    |
| Do not know                                                |     |    |
| Others specify,                                            |     |    |

**THE SECTION TO BE FILLED BY RESEARCHER**

18. Hepatitis screening results *(Tick ONE which apply)*

| Screening test                               | Results  |          |
|----------------------------------------------|----------|----------|
|                                              | Positive | Negative |
| HEPATITIS B SURFACE ANTIGEN (HBsAg)          |          |          |
| HEPATITIS B SURFACE ANTIGEN ANTIBODY (HBsAb) |          |          |
| HEPATITIS B ENVELOPE ANTIGEN (HBeAg)         |          |          |
| HEPATITIS B ENVELOPE ANTIBODY (HBeAb)        |          |          |
| HEPATITIS B CORE ANTIBODY (HBcAb)            |          |          |

19. ANTIBODY TITRE CONCENTRATION.....mIU/mL

3

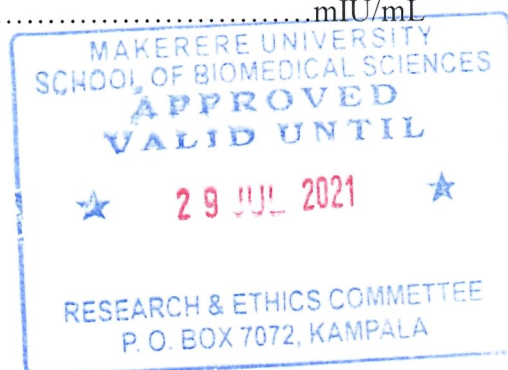

Supplement: pone.0262126.s001.pdf [file pone.0262126.s001.pdf]
